# Supplementary material for: Variation in responsiveness to warranted behaviour change among NHS clinicians: novel implementation of change detection methods in longitudinal prescribing data
Source: PubMed Central journal article supplement — BMJ. 2019 Oct 2;367:l5205. doi: 10.1136/bmj.l5205 (PMC6771379; doi:10.1136/bmj.l5205), 2019-10-02
Supplement: wala049437.ww1.pdf [file wala049437.ww1.pdf]

| <i>Practice</i>     | <i>Alex comment</i>                                                                                                            | <i>Ben comment</i>                                                                                               | <i>Resolve in discussion</i>                                                                                                                                                            | <i>action?</i>            | <i>code: 0=non-issue<br/>1=arguably sub-optimal detection<br/>2=sub-optimal detection</i> |
|---------------------|--------------------------------------------------------------------------------------------------------------------------------|------------------------------------------------------------------------------------------------------------------|-----------------------------------------------------------------------------------------------------------------------------------------------------------------------------------------|---------------------------|-------------------------------------------------------------------------------------------|
| <i>desogestrel</i>  |                                                                                                                                |                                                                                                                  |                                                                                                                                                                                         |                           |                                                                                           |
| <i>B87031</i>       | two drops -prescribing is weird                                                                                                |                                                                                                                  | agree could have been shallower slope but same initiation month. note moving p-value threshold changes this, but n detected changes in other practices drops substantially: trade-offs. |                           | 1                                                                                         |
| <i>B83033</i>       |                                                                                                                                | arguably better to detect change at 39 months and consider whole drop as one drop.                               | marginal. overall no issue here.                                                                                                                                                        |                           | 0                                                                                         |
| <i>D81062</i>       | slightly early first change                                                                                                    |                                                                                                                  | not material to the results of this study, agree somewhat interesting!                                                                                                                  |                           | 0                                                                                         |
| <i>E81009</i>       |                                                                                                                                | very much borderline, and depends on use-case, but possibly better to consider it as one drop starting month 33. | marginal. overall no issue here.                                                                                                                                                        |                           | 0                                                                                         |
| <i>E85746</i>       | I'd have drawn two flat lines with a step change                                                                               |                                                                                                                  | arguable, but noisy institution. marginal. overall no issue here.                                                                                                                       |                           | 0                                                                                         |
| <i>F81114</i>       | same as B87031                                                                                                                 |                                                                                                                  | agree could have been shallower slope and slightly earlier; as above, moving p-value threshold changes this, but n detected changes in other practices drops substantially: trade-offs. |                           | 1                                                                                         |
| <i>F84717</i>       | slightly too early                                                                                                             |                                                                                                                  | arguable, noisy series. overall no issue here.                                                                                                                                          |                           | 0                                                                                         |
| <i>J84013</i>       | same as B87031                                                                                                                 |                                                                                                                  | agree could have been shallower slope and slightly earlier; as above, moving p-value threshold changes this, but n detected changes in other practices drops substantially: trade-offs. |                           | 1                                                                                         |
| <i>L83051</i>       |                                                                                                                                | could argue better as one drop from month 47 but barely.                                                         | very marginal. overall no issue here.                                                                                                                                                   |                           | 0                                                                                         |
| <i>L84045</i>       |                                                                                                                                | could argue as one drop from month 33.                                                                           | very marginal. overall no issue here. timing unaffected                                                                                                                                 |                           | 0                                                                                         |
| <i>trimethoprim</i> |                                                                                                                                |                                                                                                                  |                                                                                                                                                                                         |                           |                                                                                           |
| <i>E84077</i>       | detects a downward shift immediately after an increase, not really the algorithm misbehaving, but not a very meaningful change |                                                                                                                  | agree, a drop seems fair, but problem with magnitude in particular.                                                                                                                     |                           | 2                                                                                         |
| <i>E86030</i>       | as above                                                                                                                       | ?off-topic but worth noting up-tick.                                                                             | agree, consider in future whether to drop observations where a large drop follows a large rise.                                                                                         | feasibility test on this? | 2                                                                                         |
| <i>F83665</i>       |                                                                                                                                | off-topic but as above wonder if in some use-cases the long second slope is more important.                      | agree, consider in future whether to prioritise the drop with the largest magnitude.                                                                                                    |                           | 0                                                                                         |
| <i>G82113</i>       | detected drop based on 2 months?? data followed by a slow increase                                                             |                                                                                                                  | odd prescribing behaviour too.                                                                                                                                                          |                           | 1                                                                                         |
